# Supplementary material for: Development and Validation of a Bedside Risk Assessment for Sustained Prescription Opioid Use After Surgery
Source: PubMed Central journal article supplement (PMC6624809; doi:10.1001/jamanetworkopen.2019.6673), 2019-07-10
Supplement: jamanetwopen-2-e196673-s001.pdf [file jamanetwopen-2-e196673-s001.pdf]

## Supplementary Online Content

Chaudhary MA, Bhulani N, de Jager EC, et al. Development and validation of a bedside risk assessment for sustained prescription opioid use after surgery. *JAMA Netw Open*. 2019;2(7):e196673. doi:10.1001/jamanetworkopen.2019.6673

**eFigure.** Area Under the Receiver Operator Curve for Generation and Validation Samples

This supplementary material has been provided by the authors to give readers additional information about their work.

**Figure: Area Under the Receiver Operator Curve for Generation and Validation Samples**

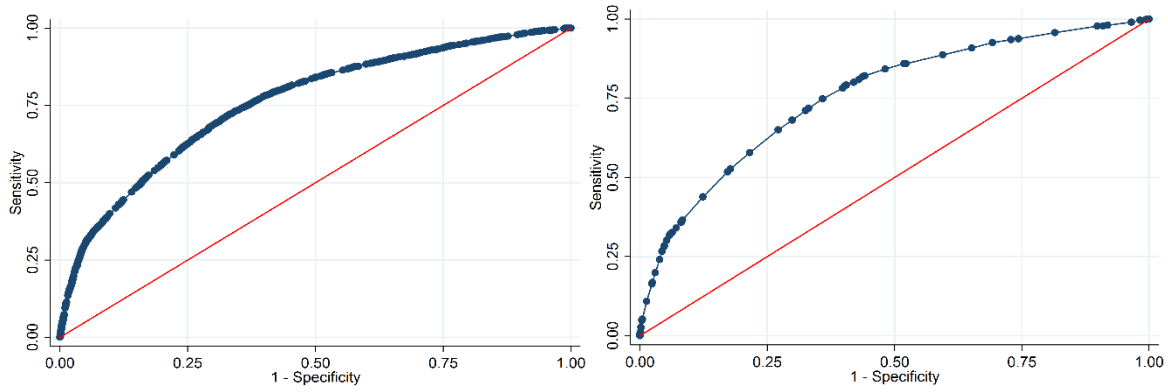

*Area Under the Receiver Operator Characteristic (AUC) Curve for Model Generation Sample. AUC=0.76*

*Area Under the Receiver Operator Characteristic (AUC) Curve for Risk Score Validation Sample. AUC=0.76*
